# Supplementary material
Source: Springer Nature journal article supplement (https://www.springermedizin.de/resource/supplementary/12931_2011_1181_MOESM3_ESM.pdf/9425500)

- Normal Control
- COPD with normal BMD
- COPD with low BMD

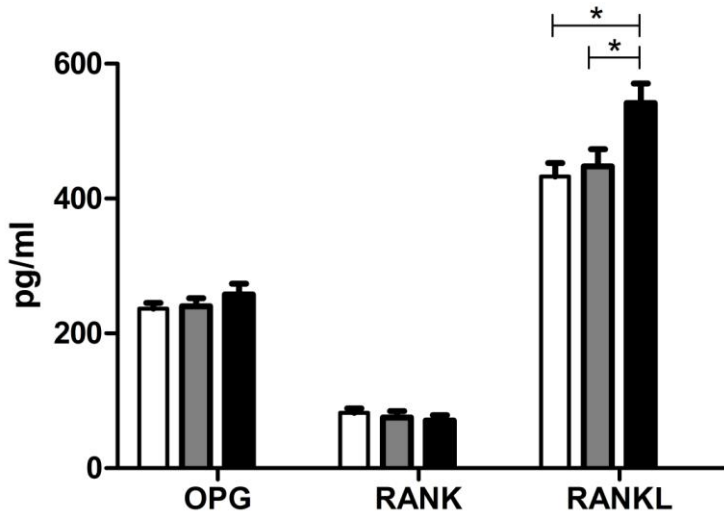

Supplement: MOESM3 [file 9425500]
